# Supplementary material for: Psychostimulants and opioids differentially influence the epigenetic modification of histone acetyltransferase and histone deacetylase in astrocytes
Source: PubMed Central journal article supplement (PMC8195369; doi:10.1371/journal.pone.0252895), 2021-06-11

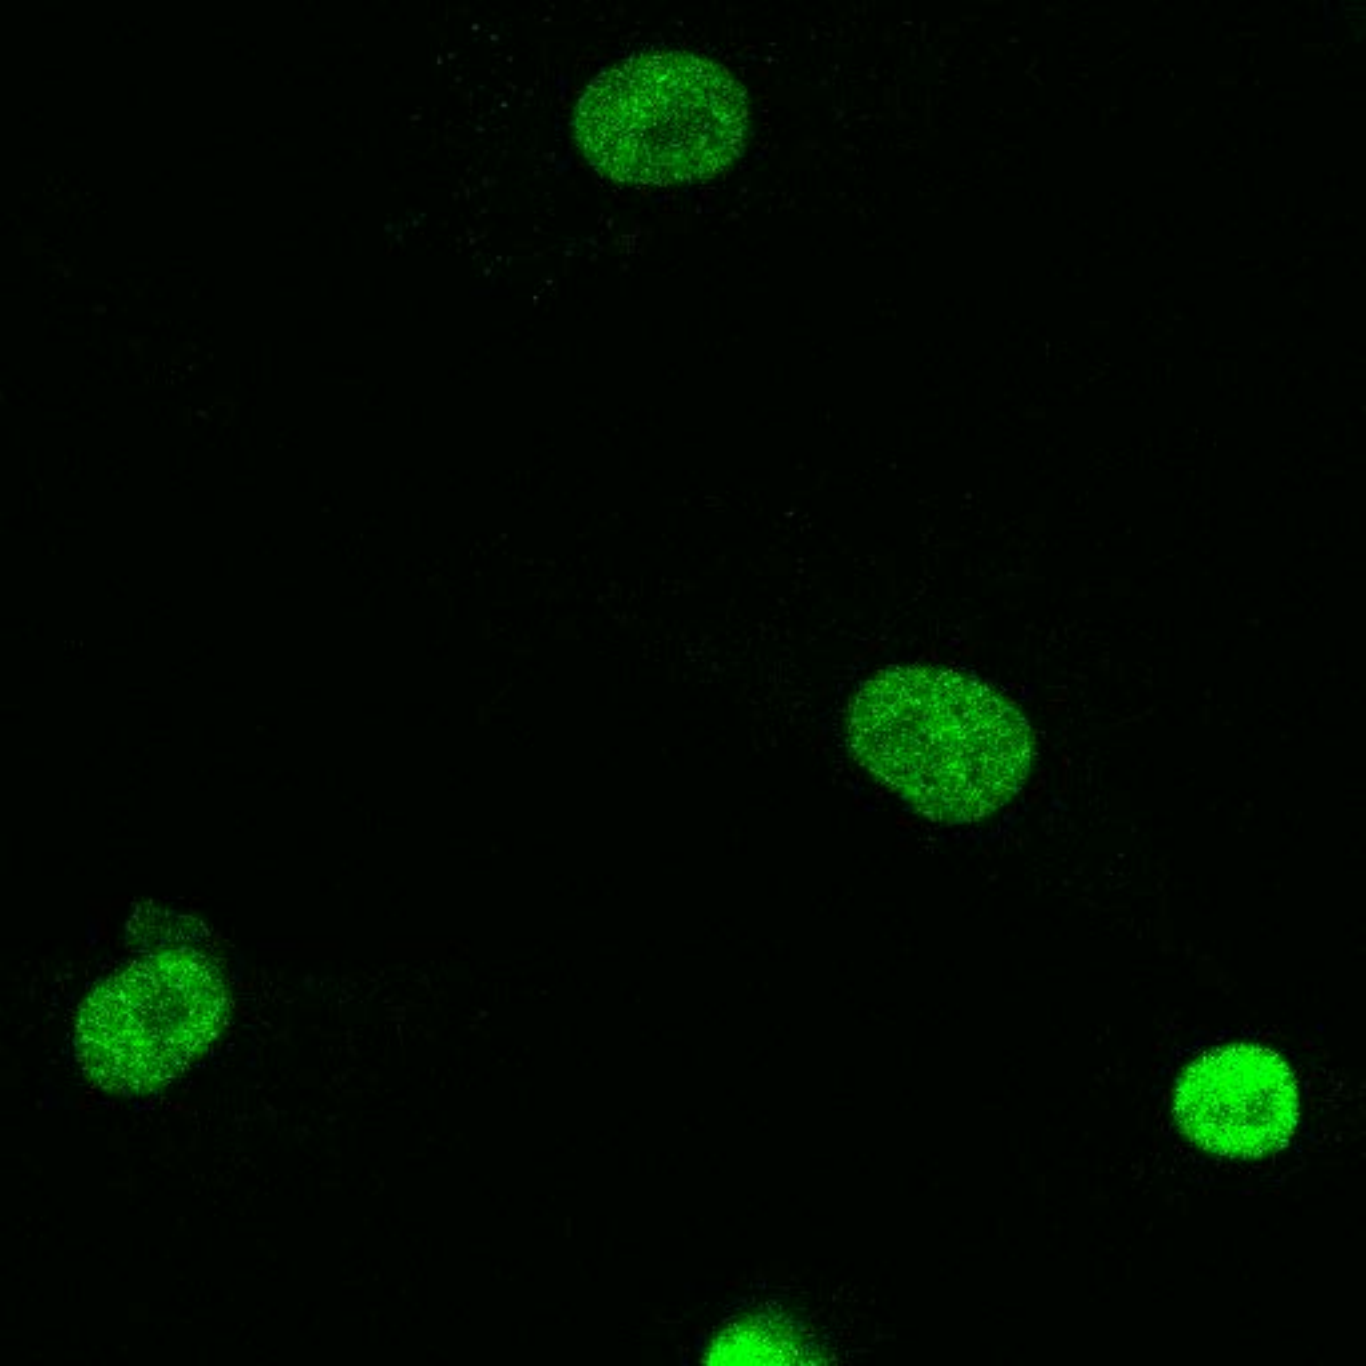

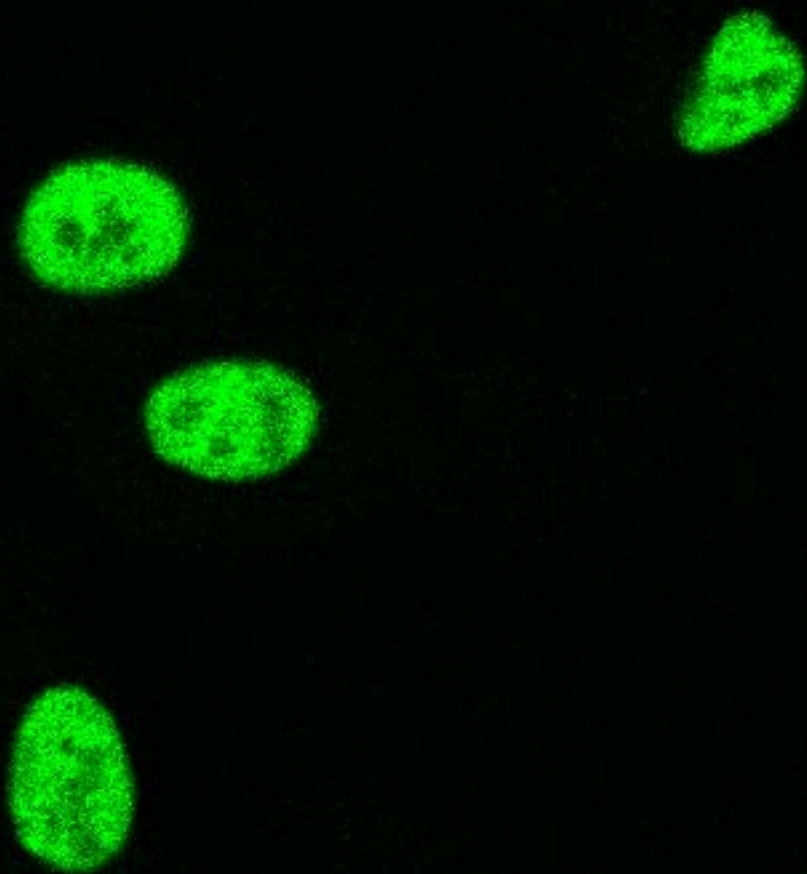

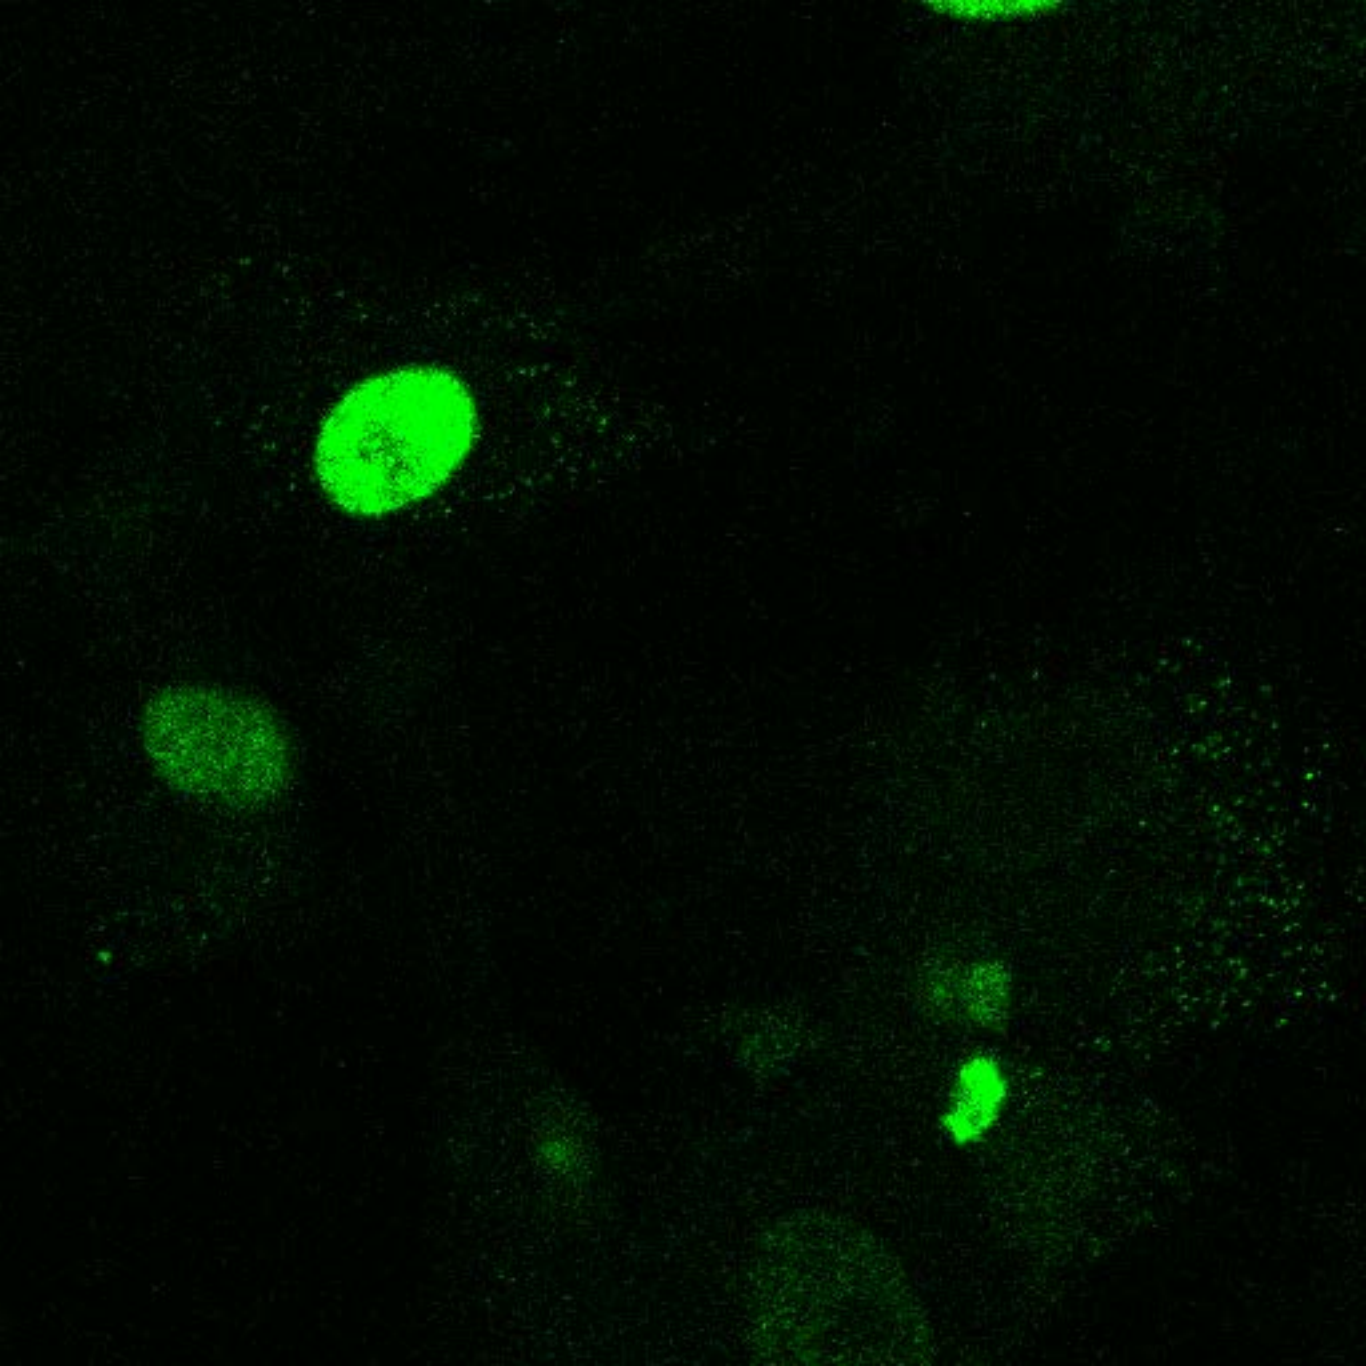

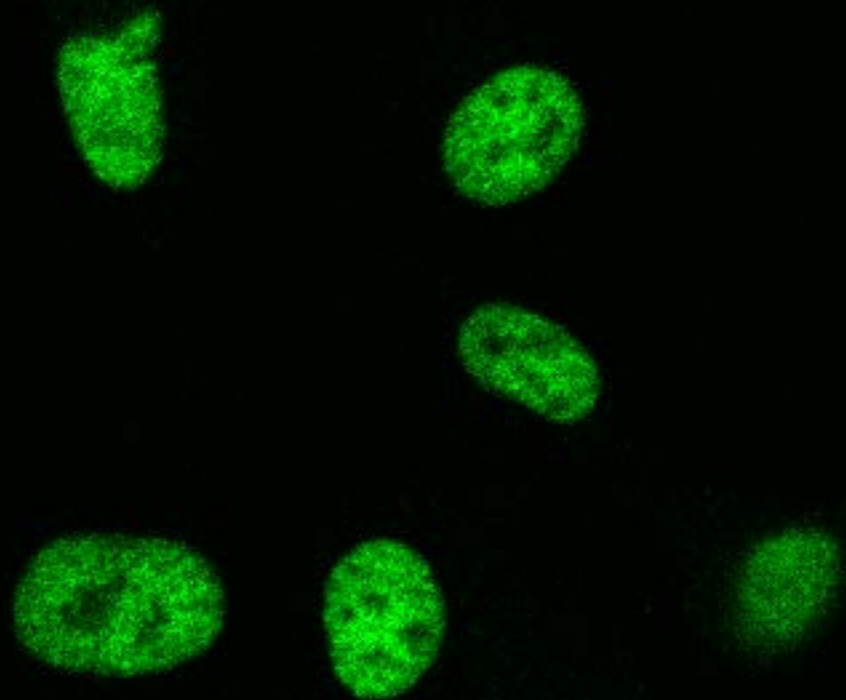

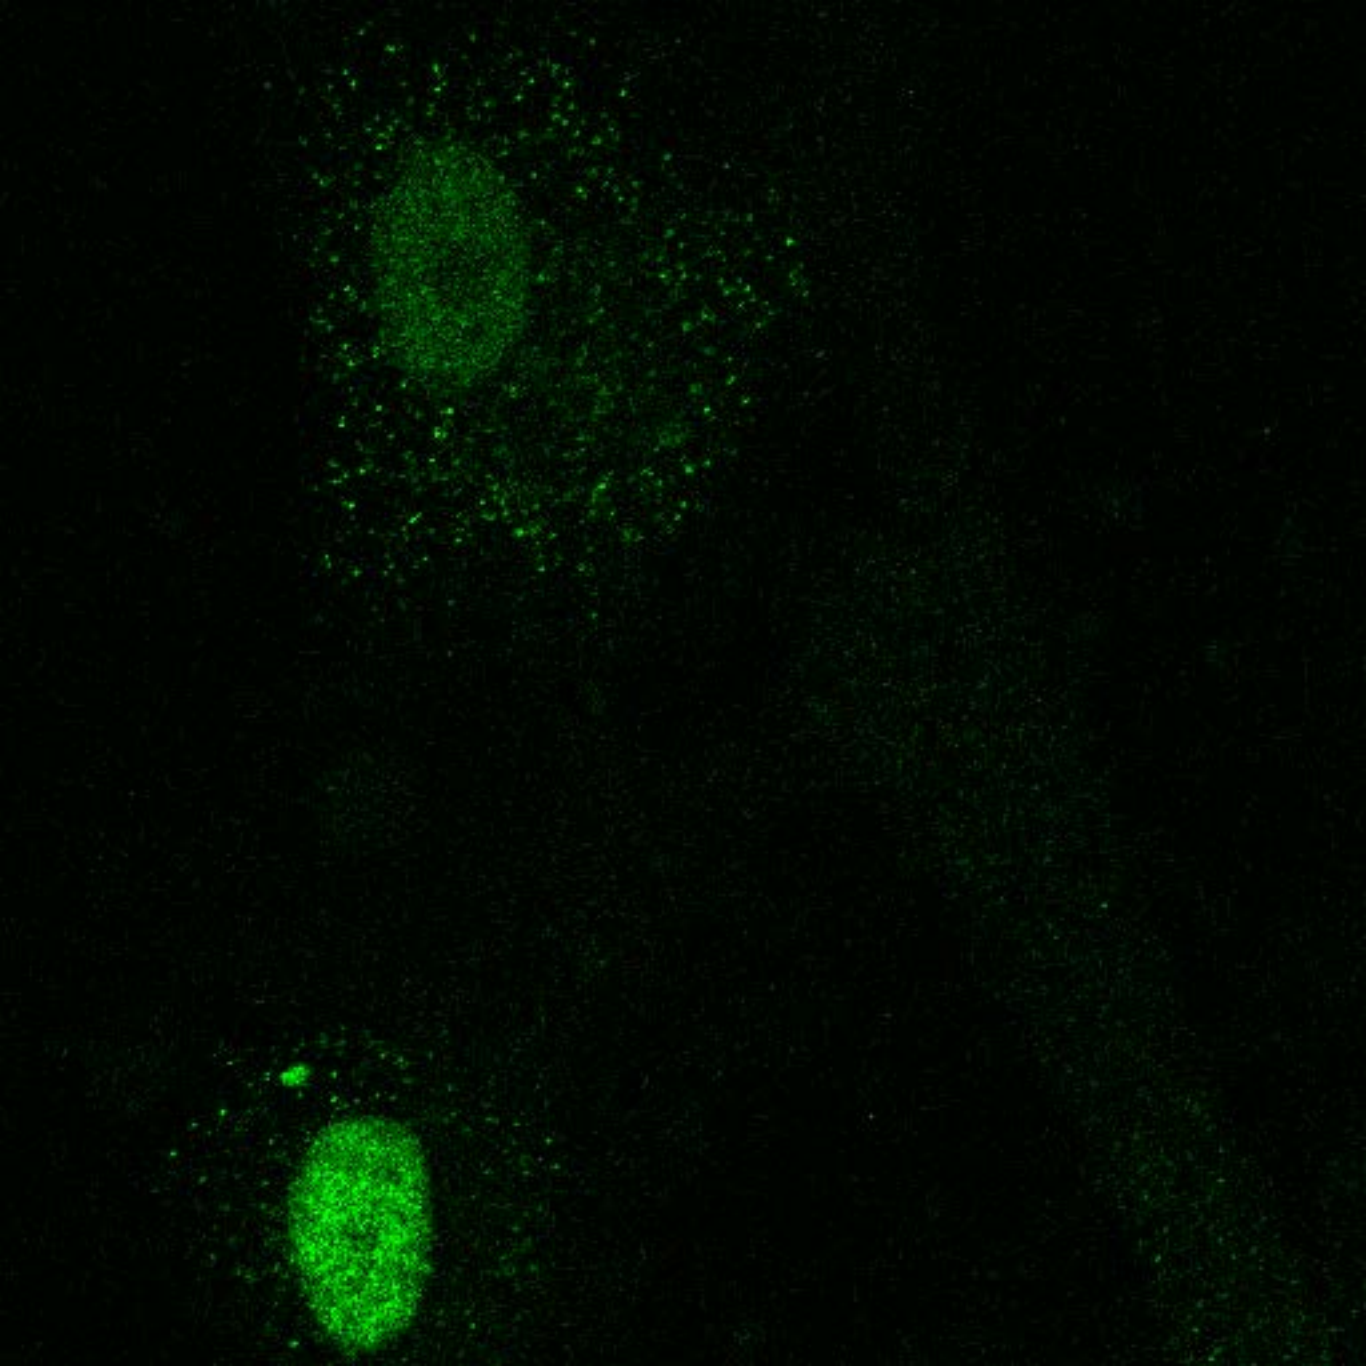

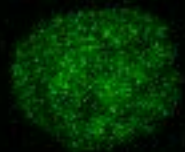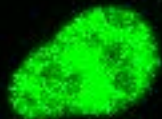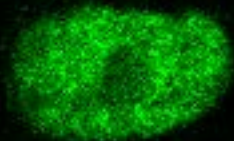



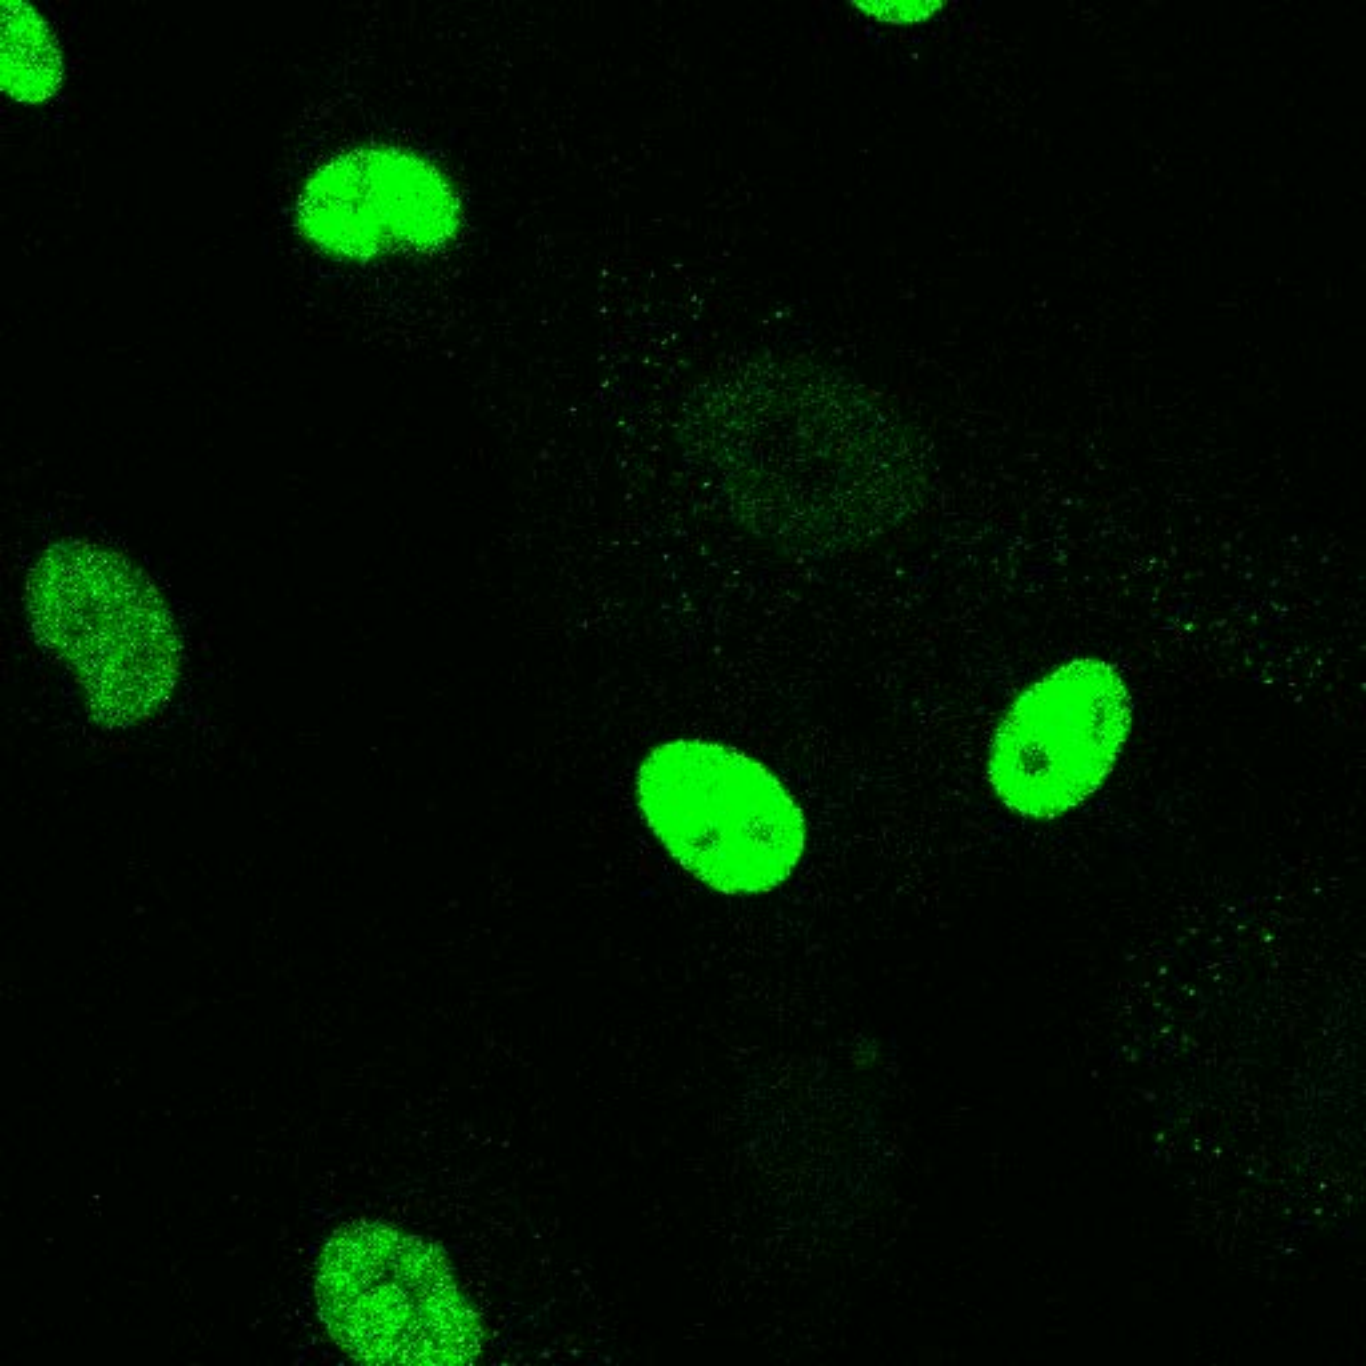

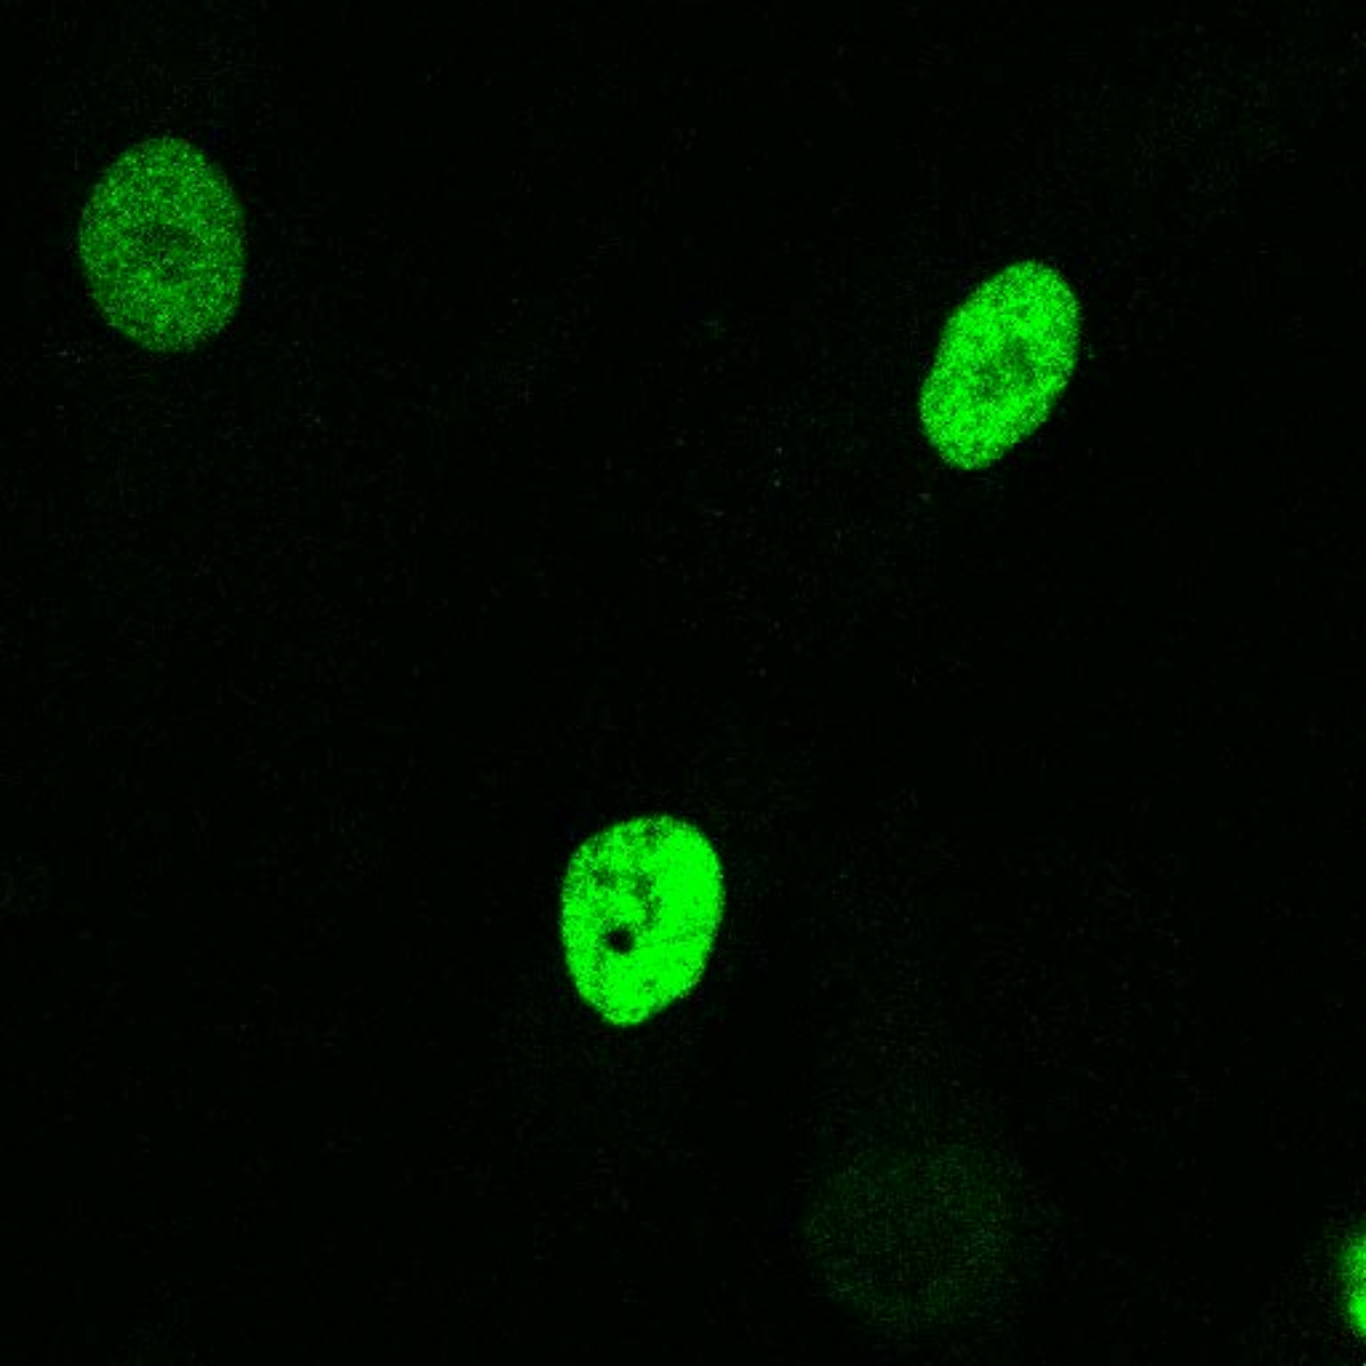



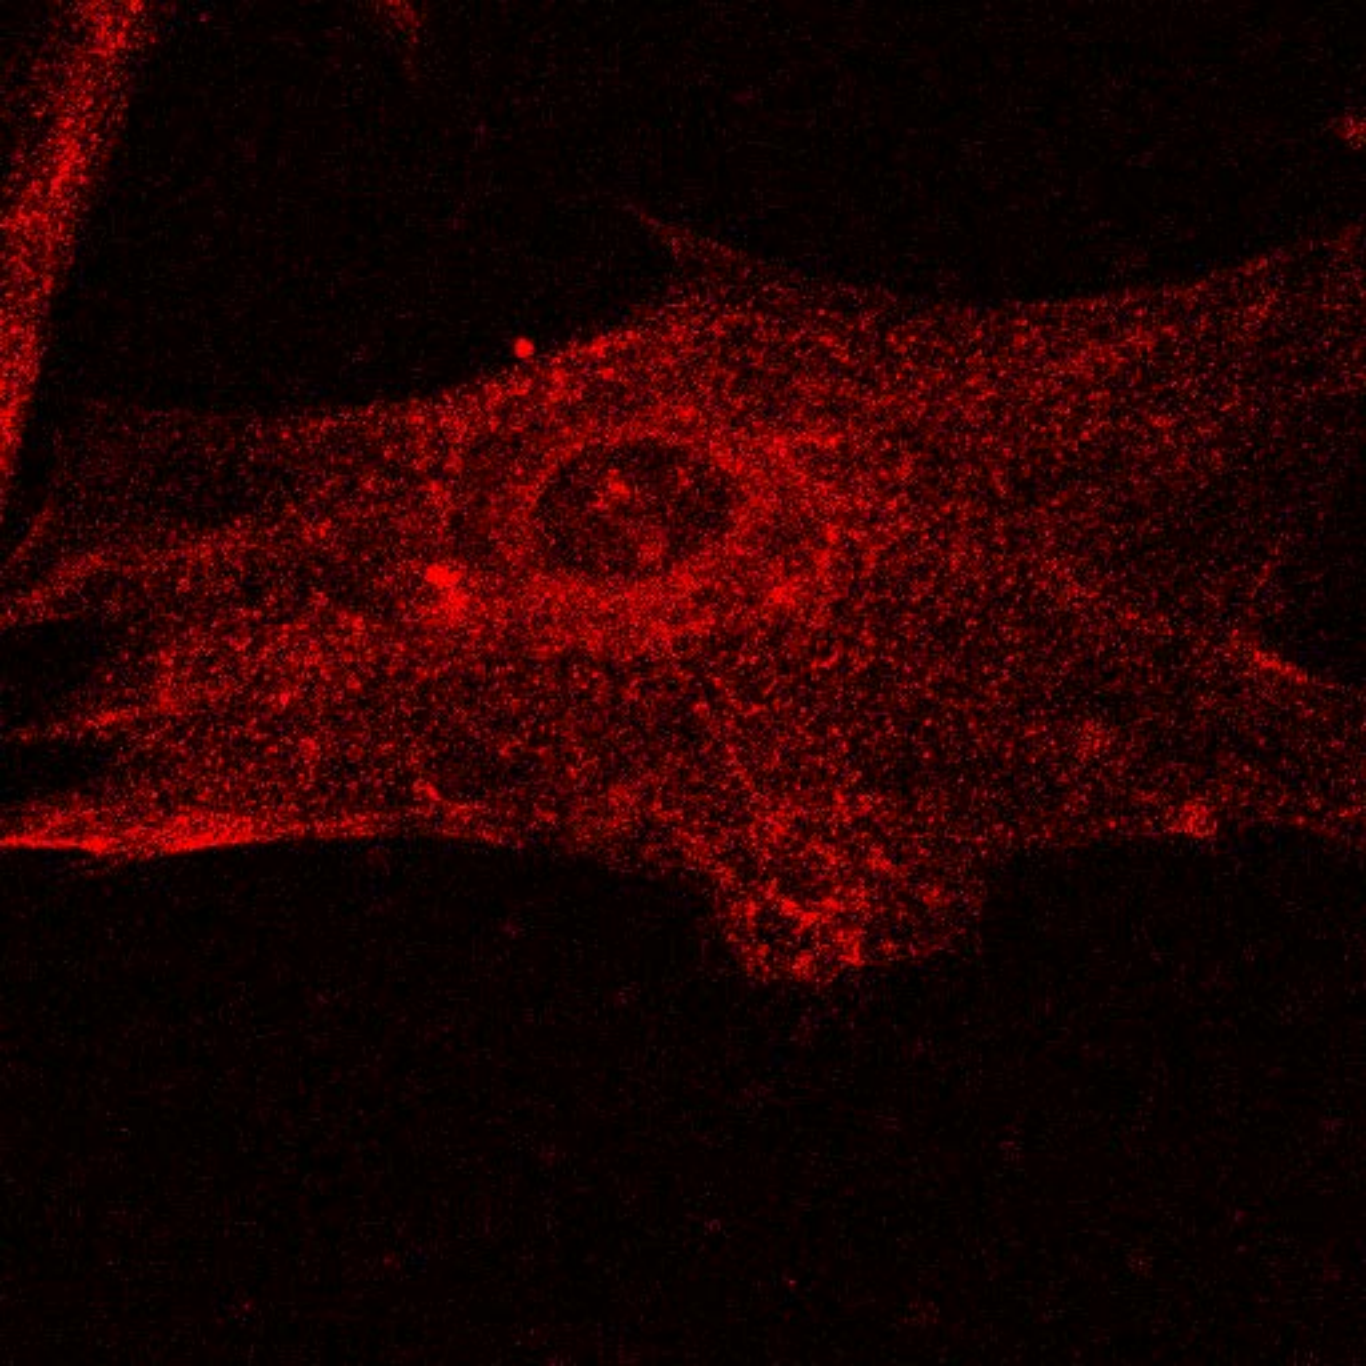

















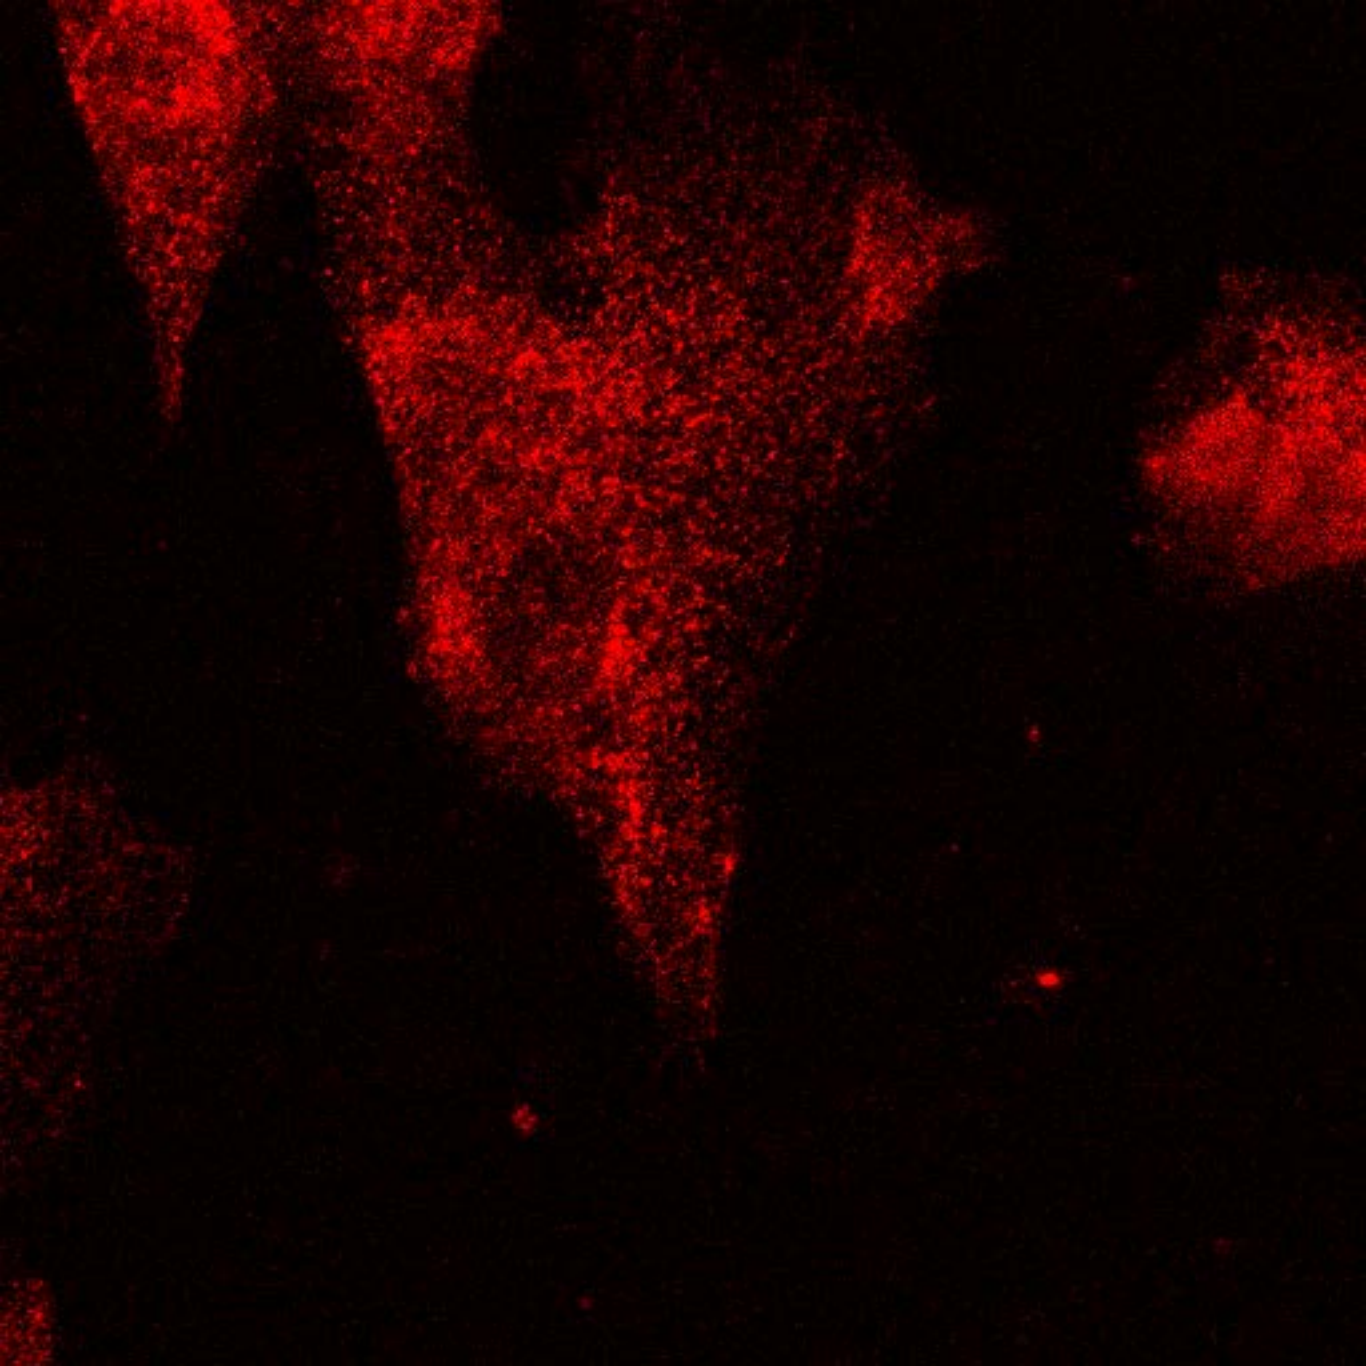

Supplement: pone.0252895.s002.pdf [file pone.0252895.s002.pdf]
